# Supplementary material
Source: PubMed Central journal article supplement (PMC2845269)
Supplement: emboj2009413s1.pdf [file emboj2009413s1.pdf]

Williams *et al.*

## SUPPLEMENTAL DATA

### **$\gamma$ H2A Binds Brc1 to Maintain Genome Integrity During S-Phase**

Jessica S. Williams<sup>1,5,6</sup>, R. Scott Williams<sup>1,2,5,6</sup>, Claire L. Dovey<sup>1</sup>, Grant Guenther<sup>1,2</sup>, John A. Tainer<sup>1,2,3,4\*</sup>, and Paul Russell<sup>1,3\*</sup>

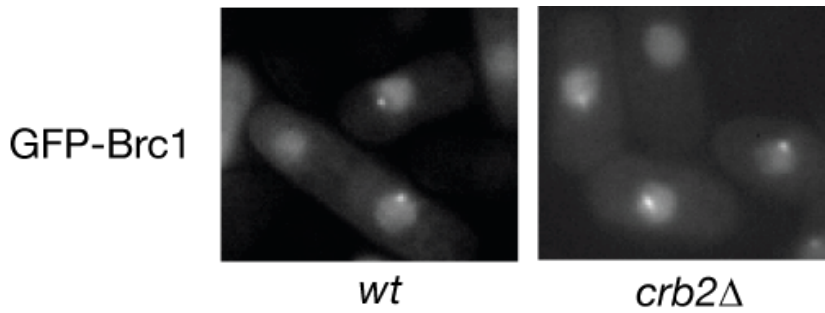

**Figure S1. Crb2 is not required for spontaneous Brc1 foci formation.** Cells were grown to mid-log phase in selective medium and live cell microscopy was performed of ectopically expressed GFP-Brc1 driven by the *nmr1* promoter in wt and *crb2Δ* cells.

A

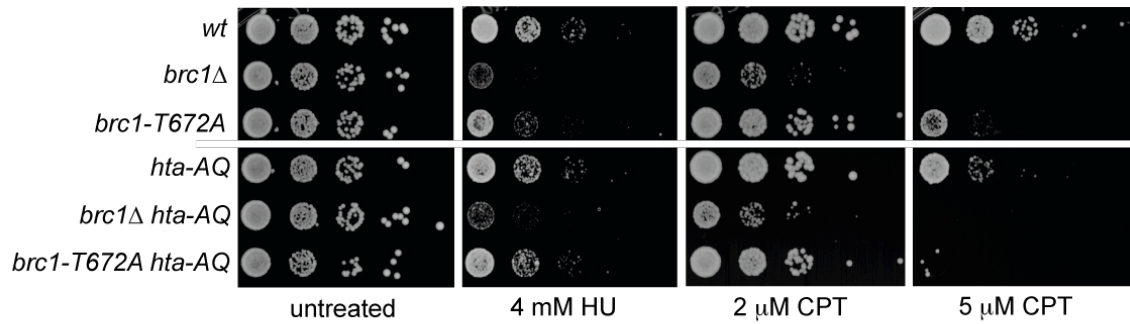

B

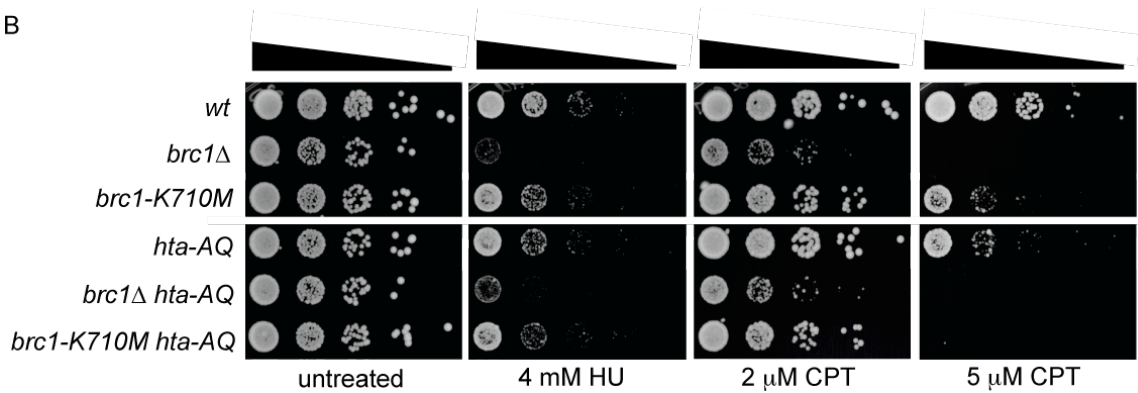

**Figure S2. Genetic epistasis analysis of the *brc1-BRCT* and *hta-AQ* mutants.** Ten-fold serial dilutions of cells were exposed to the indicated S-phase DNA damaging agent and incubated at 30°C for 3 days.

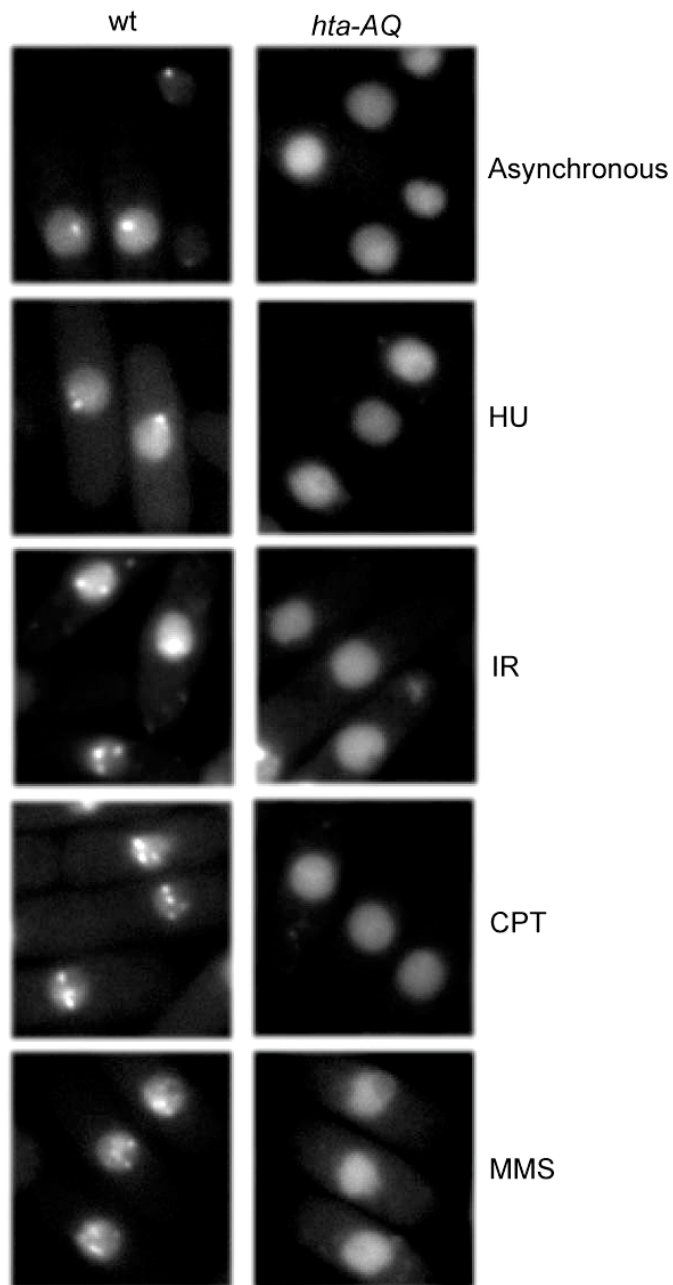

**Figure S3.  $\gamma$ H2A is required for Brc1 foci formation in response to DNA damaging agents.** Cells were grown to mid-log phase in selective medium and live cell microscopy was performed of ectopically expressed GFP-Brc1 driven by the *nmt41* promoter in wt and *hta-AQ* cells. Treatment was with 12 mM HU for 4h, 30  $\mu$ M CPT for 4h, 0.03% MMS for 5h, or 120 Gy IR plus 2h recovery.

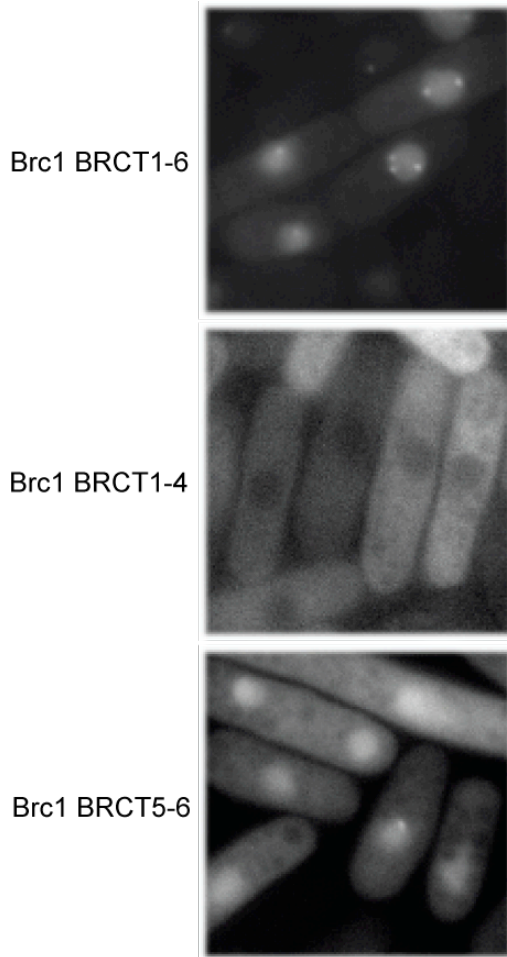

**Figure S4. The Brc1 BRCT<sub>5</sub>-BRCT<sub>6</sub> domain is necessary and sufficient for spontaneous foci formation.** Cells were grown to mid-log phase in selective medium and live cell microscopy was performed of ectopically expressed Brc1 full-length (BRCT1-6), BRCT1-4 and BRCT5-6 versions driven by the *nmt41* promoter in wt cells.

**Table S1. The genotypes of strains used in this study.**

| <b>Strain</b> | <b>Genotype</b>                                                                                                        | <b>Source</b> |
|---------------|------------------------------------------------------------------------------------------------------------------------|---------------|
| CD4101        | <i>h- rad22-D2::LEU2</i>                                                                                               | Lab stock     |
| LLD3260       | <i>h- ura4-D18 crb2::ura4<sup>+</sup> leu1-32::2xYFP-crb2-wt-leu1<sup>+</sup></i>                                      | Lab stock     |
| LLD4116       | <i>h- ura4-D18 crb2::ura4<sup>+</sup> leu1-32::2xCFP-crb2-wt-leu1<sup>+</sup></i>                                      | Lab stock     |
| 1598          | <i>h- leu1-32</i>                                                                                                      | Lab stock     |
| 3259          | <i>h- leu1-32 ura4-D18 crb2::ura4<sup>+</sup></i>                                                                      | Lab stock     |
| 3333          | <i>h+ ura4-D18 leu1-32 his3-D1 rad22-YFP-KanMx</i>                                                                     | Lab stock     |
| JW29          | <i>h- ura4-D18 leu1-32 pRep41-N-GFP</i>                                                                                | This study    |
| JW59          | <i>h- leu1-32 brc1::KanMx</i>                                                                                          | This study    |
| JW60          | <i>h+ leu1-32 brc1::KanMx</i>                                                                                          | This study    |
| JW98          | <i>h? ura4-D18 leu1-32 pRep41-N-GFP-brc1<sup>+</sup> hta1-S129A::ura4<sup>+</sup><br/>hta2-S128A::his3<sup>+</sup></i> | This study    |
| JW107         | <i>h- ura4-D18 leu1-32 pRep41-N-GFP-brc1<sup>+</sup></i>                                                               | This study    |
| JW109         | <i>h- ura4-D18 leu1-32 pRep41-N-GFP-brc1-T672A</i>                                                                     | This study    |
| JW113         | <i>h- ura4-D18 leu1-32 brc1::KanMx pRep41-N-GFP-brc1<sup>+</sup></i>                                                   | This study    |
| JW184         | <i>h- ura4-D18 leu1-32 crb2::ura4<sup>+</sup> brc1::KanMx</i>                                                          | This study    |
| JW219         | <i>h? ura4-D18 leu1-32 ade6-M210 his3-D1 rad3::ura4<sup>+</sup><br/>tel1::KanMx pRep41-N-GFP-brc1<sup>+</sup></i>      | This study    |
| JW223         | <i>h+ ura4-D18 leu1-32 his3-D1 ade6-M216 rad3::ura4<sup>+</sup><br/>pRep41-N-GFP-brc1<sup>+</sup></i>                  | This study    |
| JW228         | <i>h+ ura4-D18 leu1-32 tel1::KanMx his3-D1 ade6-M216<br/>pRep41-N-GFP-brc1<sup>+</sup></i>                             | This study    |
| JW265         | <i>h+ leu1-32 brc1-wt-2xGFP:HphMx</i>                                                                                  | This study    |
| JW270         | <i>h? ura4-D18 leu1-32 crb2::ura4<sup>+</sup> pRep41-N-GFP-brc1<sup>+</sup></i>                                        | This study    |
| JW271         | <i>h- ura4-D18 leu1-32 pRep41-N-GFP-brc1-K710M</i>                                                                     | This study    |
| JW307         | <i>h+ leu1-32 brc1-T672A-2xGFP:HphMx</i>                                                                               | This study    |
| JW309         | <i>h+ leu1-32 brc1-K710M-2xGFP:HphMx</i>                                                                               | This study    |

|       |                                                                                                                      |            |
|-------|----------------------------------------------------------------------------------------------------------------------|------------|
| JW397 | <i>h+ leu1-32 brc1::HphMx</i>                                                                                        | This study |
| JW414 | <i>h- ura4-D18 leu1-32 his3-D1 brc1::HphMx rad22-YFP-KanMx</i>                                                       | This study |
| JW451 | <i>h- ura4-D18 leu1-32 his3-D1 rad22-RFP:NatMx pRep41-N-GFP</i>                                                      | This study |
| JW452 | <i>h- ura4-D18 leu1-32 his3-D1 rad22-RFP:NatMx<br/>pRep41-N-GFP-brc1<sup>+</sup></i>                                 | This study |
| JW479 | <i>h- ura4-D18 leu1-32 gar1-RFP:KanMx pRep41-N-GFP</i>                                                               | This study |
| JW480 | <i>h- ura4-D18 leu1-32 gar1-RFP:KanMx pRep41-N-GFP-brc1<sup>+</sup></i>                                              | This study |
| JW485 | <i>h- ura4-D18 leu1-32 brc1::HphMx pREP41-N-GFP-brc1<sup>+</sup></i>                                                 | This study |
| JW487 | <i>h- ura4-D18 leu1-32 brc1::HphMx pREP41-N-GFP-brc1-BRCT<sub>5-6</sub></i>                                          | This study |
| JW488 | <i>h- ura4-D18 leu1-32 brc1::HphMx pREP41-N-GFP-brc1-BRCT<sub>1-4</sub></i>                                          | This study |
| JW523 | <i>h? ura4-D18 leu1-32 brc1::HphMx pRep41-N-GFP-brc1-R707E</i>                                                       | This study |
| JW535 | <i>h-? ura4-D18 leu1-32 brc1::HphMx pRep41-N-GFP-brc1-R704E</i>                                                      | This study |
| JW702 | <i>h? ura4-D18 crb2::NatMx leu1-32::2xCFP-crb2-wt-leu1<sup>+</sup><br/>pRep42-N-GFP brc1::HphMx</i>                  | This study |
| JW704 | <i>h? ura4-D18 crb2::NatMx leu1-32::2xCFP-crb2-wt-leu1<sup>+</sup><br/>pRep42-N-GFP-brc1<sup>+</sup> brc1::HphMx</i> | This study |

**Table S2: X-ray diffraction data collection, phasing, and refinement statistics**

| Data Collection                                     |                                    |                                                       |             |                                               |                                               |       |
|-----------------------------------------------------|------------------------------------|-------------------------------------------------------|-------------|-----------------------------------------------|-----------------------------------------------|-------|
| Data set                                            | BRCT5/6-MAD                        |                                                       |             | BRCT5/6-Native                                | BRCT5/6: $\gamma$ H2A complex                 |       |
| Space group                                         | P2 <sub>1</sub> ( $\beta$ =101.91) |                                                       |             | P2 <sub>1</sub> 2 <sub>1</sub> 2 <sub>1</sub> | P2 <sub>1</sub> 2 <sub>1</sub> 2 <sub>1</sub> |       |
| Cell dimensions                                     | a (Å)                              | 51.29                                                 |             |                                               | 60.47                                         | 41.58 |
|                                                     | b (Å)                              | 84.47                                                 |             |                                               | 83.43                                         | 71.12 |
|                                                     | c (Å)                              | 50.88                                                 |             |                                               | 87.25                                         | 72.01 |
|                                                     | $\lambda$ 1                        | $\lambda$ 2                                           | $\lambda$ 3 |                                               |                                               |       |
| Wavelength (Å)                                      | 0.9796                             | 0.9797                                                | 1.0087      | 1.111                                         | 1.111                                         |       |
| Resolution range (Å)                                | 50-1.80                            | 50-1.80                                               | 50-1.80     | 50-1.55                                       | 50-1.45                                       |       |
| Observations <sup>1</sup>                           | 284722                             | 284297                                                | 293611      | 420116                                        | 137096                                        |       |
| Unique reflections <sup>1</sup>                     | 39433                              | 39454                                                 | 38791       | 61324                                         | 36848                                         |       |
| Data coverage:                                      | 97.6/90.7                          | 97.5/89.6                                             | 98.3/97.3   | 94.8/67.0                                     | 95.6/67.7                                     |       |
| total/final shell <sup>2</sup> (%)                  |                                    |                                                       |             |                                               |                                               |       |
| <I/ $\sigma$ > total/final shell                    | 23.7/2.8                           | 24.4/2.75                                             | 26.1/4.17   | 38.6/2.2                                      | 21.7/2.6                                      |       |
| R <sub>sym</sub> total/final shell (%) <sup>3</sup> | 6.1/31.7                           | 5.6/32.2                                              | 5.3/32.5    | 4.5/50.2                                      | 5.2/23.9                                      |       |
| <b>Phasing Statistics</b>                           |                                    | <b>Refinement Statistics</b>                          |             |                                               |                                               |       |
| Resolution range (Å)                                | 50-1.80                            | Resolution range(Å)                                   |             | 50-1.55                                       | 50-1.45                                       |       |
| # of Selenium Sites                                 | 4/4 for 440 aa                     | R <sub>work</sub> /R <sub>free</sub> (%) <sup>4</sup> |             | 17.9/22.5                                     | 13.1/18.8                                     |       |
| <FOM> from Solve                                    | 0.37                               | Refined atoms                                         | Protein     | 3368                                          | 1696                                          |       |
| <FOM> from Resolve                                  | 0.59                               |                                                       | Solvent     | 407                                           | 451                                           |       |
|                                                     |                                    |                                                       | Peptide     | -                                             | 49                                            |       |
|                                                     |                                    | R.m.s. deviations                                     | Bonds (Å)   | 0.020                                         | 0.021                                         |       |
|                                                     |                                    |                                                       | Angles (°)  | 1.79                                          | 1.84                                          |       |
|                                                     |                                    | Average B-factors(Å <sup>2</sup> )                    | Protein     | 27.1                                          | 11.3                                          |       |
|                                                     |                                    |                                                       | Solvent     | 35.4                                          | 31.5                                          |       |
|                                                     |                                    |                                                       | Peptide     | -                                             | 13.2                                          |       |
|                                                     |                                    | Ramachandran <sup>5</sup>                             | Core        | 94.6                                          | 93.4                                          |       |
|                                                     |                                    |                                                       | Allowed     | 5.4                                           | 6.6                                           |       |
|                                                     |                                    |                                                       | Generous    | 0.0                                           | 0.0                                           |       |
|                                                     |                                    |                                                       | Disallowed  | 0.0                                           | 0.0                                           |       |

<sup>1</sup> For MAD datasets, Bijvoets (I+ and I-) were kept separate during scaling and for calculation of statistics.

<sup>2</sup> Final shell: 1.85-1.80 Å (MAD); 1.61-1.55 (Brc1-Native); 1.5-1.45 (Brc1- $\gamma$ H2A complex)

<sup>3</sup>  $R_{sym} = \sum (|I_{hkl}| - \langle I \rangle) / \sum I_{hkl}$  where  $I_{hkl}$  is the integrated intensity of a given reflection.

<sup>4</sup>  $R_{work} = \sum_h |F_o(h) - F_c(h)| / \sum_h |F_o(h)|$ , where  $F_o(h)$  and  $F_c(h)$  are observed and calculated structure factors.  $R_{free}$  calculated with 5% of all reflections excluded from refinement stages using the native data set. No  $I/\sigma$  cutoff was used in the refinement.

<sup>5</sup> PROCHECK Ramachandran plot statistics.
